# Supplementary material for: Association between Sarcopenia and Its Longitudinal Changes with all-cause mortality in individuals with Cardiovascular-Kidney-Metabolic syndrome
Source: Research Square preprint supplement (doi:10.21203/rs.3.rs-7888645/v1), 2025-11-11
Supplement: Supplementary file 1 [file 24ce70e1c7785acc796066e4.pdf]

17708 participants in CHARLS at baseline

Excluded:

Missing data on age, gender or age < 45 years old (n = 419)

Missing data on CKM syndrome indicators (n=5045)

Missing data on sarcopenia status (n=2304)

Missing data on follow-up data (n=1968)

7972 participants included in analysis 1:  
baseline sarcopenia and all-cause mortality analysis

Excluded:

Missing data on sarcopenia status in Wave 2 (n = 2212)

5760 participants included in analysis 2:  
sarcopenia trajectory and all-cause mortality analysis
