# Supplementary material for: Association between Sarcopenia and Its Longitudinal Changes with all-cause mortality in individuals with Cardiovascular-Kidney-Metabolic syndrome
Source: Research Square preprint supplement (doi:10.21203/rs.3.rs-7888645/v1), 2025-11-11
Supplement: Supplementary file 1 [file 6027267cdaea0916a02f85e5.docx]

**Supplemental Figure legends**

**Fig. S1 Flowchart of this study**

**Fig. S2 Kaplan-Meier curves for all-cause mortality in participants with CKM syndrome**

A. Tertiles of HGS; B. Tertiles of SMI; C. Stratified by HGS and CKM syndrome stages; D. Stratified by SMI and CKM syndrome stages

**Fig. S3 Associations between sarcopenic components and the risk of all-cause mortality in participants with CKM syndrome based on restricted cubic spline models**

A. HGS; B. SMI

Abbreviations: HGS, handgrip strength; SMI, skeletal muscle index; HR, hazard ratio; CI, confidence interval
