# Supplementary material for: Association between Sarcopenia and Its Longitudinal Changes with all-cause mortality in individuals with Cardiovascular-Kidney-Metabolic syndrome
Source: Research Square preprint supplement (doi:10.21203/rs.3.rs-7888645/v1), 2025-11-11
Supplement: Supplementary file 2 [file ef35d95a594003f556c275a8.xlsx]

## Sheet: Content
Supplemental Table Content
Supplemental Table 1. Association between sarcopenia components and the risk of all‐cause mortality in participants with CKM syndrome
Supplemental Table 2. Baseline characteristics of participants stratified by sarcopenia status and CKM syndrome stages
Supplemental Table 3. Association between HGS and the risk of all-cause mortality stratified by early and advanced CKM syndrome stages
Supplemental Table 4. Association between SMI and the risk of all-cause mortality stratified by early and advanced CKM syndrome stages
Supplemental Table 5. Association between sarcopenia and the risk of all‐cause mortality after excluding participants with cancer, liver disease, kidney disease and lung disease across different CKM syndrome stages
Supplemental Table 6. Association between sarcopenia and the risk of premature deaths across different CKM syndrome stages
Supplemental Table 7. Association between newly classified sarcopenia status and the risk of all‐cause mortality across different CKM syndrome stages
Supplemental Table 8. Baseline characteristics of participants stratified by changes in sarcopenic status

## Sheet: Table S1
Table S1 Association between sarcopenia components and the risk of all‐cause mortality in participants with CKM syndrome
	Model 1		Model 2		Model 3
	HR (95% CI)	P	HR (95% CI)	P	HR (95% CI)	P
HGS tertiles
Q1	Ref		Ref		Ref
Q2	0.701 (0.526-0.936)	0.016	0.659 (0.478-0.909)	0.011	0.677 (0.489-0.936)	0.018
Q3	0.444 (0.318-0.620)	<0.001	0.479 (0.318-0.721)	<0.001	0.475 (0.314-0.721)	<0.001
P for trend		<0.001		<0.001		<0.001
SMI tertiles
Q1	Ref		Ref		Ref
Q2	1.223 (0.907-1.651)	0.187	0.742 (0.480-1.147)	0.179	0.739 (0.478-1.141)	0.173
Q3	0.872 (0.630-1.207)	0.41	0.607 (0.368-1.004)	0.052	0.596 (0.358-0.994)	0.047
P for trend		0.432		0.054		0.048
Model 1: Unadjusted model; Model 2: adjusted for age and gender; Model 3: Model 2 further adjusted for education, residence, marital, smoking, drinking, and serum creatinine. Abbreviations: HGS, handgrip strength; SMI, skeletal muscle index; HR, hazard ratio; CI, confidence interval; Ref, reference.

## Sheet: Table S2
Table S2 Baseline characteristics of participants stratified by sarcopenia status and CKM syndrome stages
Variable	Total	Early CKM without sarcopenia	Early CKM with sarcopenia	Advanced CKM without sarcopenia	Advanced CKM with sarcopenia	P
	(n=7972)	(n=3811)	(n=460)	(n=3043)	(n=658)
Gender						<0.01
Female (%)	4241 (53.20)	2371 (62.22)	316 (68.70)	1271 (41.77)	283 (43.01)
Male (%)	3731 (46.80)	1440 (37.79)	144 (31.30)	1772 (58.23)	375 (56.99)
Age (years)	58.88 ± 8.83	54.10 ± 6.53	64.58 ± 6.86	61.55 ± 7.97	70.18 ± 7.42	<0.01
Married (%)	7078 (88.79)	3546 (93.05)	371 (80.65)	2671 (87.78)	490 (74.47)	<0.01
Education						<0.01
Less than lower secondary education	7166 (89.89)	3361 (88.19)	451 (98.04)	2717 (89.29)	637 (96.81)
Tertiary education	114 (1.43)	52 (1.36)	0 (0)	57 (1.87)	5 (0.76)
Upper secondary and vocational training	692 (8.68)	398 (10.44)	9 (1.96)	269 (8.84)	16 (2.43)
Rural residence (%)	5251 (65.87)	2561 (67.20)	358 (77.83)	1810 (59.48)	522 (79.33)	<0.01
Smoking (%)	2514 (31.54)	752 (19.73)	67 (14.57)	1358 (44.63)	337 (51.22)	<0.01
Drinking (%)	2661 (33.38)	1207 (31.67)	110 (23.91)	1114 (36.61)	230 (34.95)	<0.01
SBP (mmHg)	130.67 ± 21.07	124.95 ± 18.87	123.59 ± 20.91	137.53 ± 20.66	137.05 ± 23.56	<0.01
DBP (mmHg)	76.05 ± 12.06	74.71 ± 11.75	69.53 ± 10.52	79.09 ± 11.84	74.27 ± 12.29	<0.01
BMI (kg/m2)	23.64 ± 3.85	24.04 ± 3.56	19.05 ± 1.67	24.79 ± 3.57	19.14 ± 1.68	<0.01
CRP (mg/L)	2.63 ± 7.70	2.20 ± 6.37	2.21 ± 6.02	3.12 ± 9.09	3.08 ± 8.58	<0.01
FPG (mg/dL)	109.75 ± 35.13	102.81 ± 20.80	101.08 ± 13.42	119.69 ± 46.63	110.07 ± 38.45	<0.01
HbA1c (%)	5.26 ± 0.75	5.14 ± 0.52	5.11 ± 0.42	5.45 ± 0.99	5.20 ± 0.64	<0.01
TC (mg/dL)	194.92 ± 38.94	189.70 ± 34.96	186.18 ± 32.82	202.47 ± 42.69	196.36 ± 40.48	<0.01
HDL-C (mg/dL)	50.93 ± 15.14	52.72 ± 14.30	61.42 ± 14.56	46.02 ± 14.01	55.97 ± 17.49	<0.01
LDL-C (mg/dL)	117.33 ± 35.26	114.65 ± 32.12	108.74 ± 29.01	122.20 ± 38.89	116.31 ± 36.19	<0.01
TG (mg/dL)	135.46 ± 111.95	118.79 ± 76.05	92.86 ± 47.49	166.05 ± 146.21	120.38 ± 102.53	<0.01
Creatinine (mg/dL)	0.78 ± 0.20	0.76 ± 0.16	0.73 ± 0.16	0.83 ± 0.23	0.814 ± 0.271	<0.01
BUN (mg/dL)	15.72 ± 4.42	15.35 ± 4.27	15.83 ± 4.43	15.96 ± 4.48	16.632 ± 4.745	<0.01
Cancer (%)	63 (0.79)	31 (0.82)	5 (1.10)	25 (0.82)	2 (0.30)	0.46
Lung disease (%)	803 (10.10)	285 (7.50)	59 (12.94)	341 (11.23)	118 (18.02)	<0.01
Liver disease (%)	247 (3.12)	106 (2.80)	13 (2.85)	108 (3.57)	20 (3.05)	0.33
Kidney disease (%)	437 (5.51)	172 (4.54)	24 (5.26)	208 (6.86)	33 (5.06)	<0.01
Data were expressed as mean ± SD or numbers (percentages). Abbreviations: SBP, systolic blood pressure; DBP, diastolic blood pressure; CRP, C-reactive protein; BMI, body mass index; FPG, fasting plasma glucose; HbA1c, glycated hemoglobin; BUN, blood urea nitrogen; TC, total cholesterol; HDL-C, high-density lipoprotein cholesterol; LDL-C, low-density lipoprotein cholesterol; TG, triglyceride; CKM,…

## Sheet: Table S3
Table S3 Association between HGS and the risk of all-cause mortality stratified by early and advanced CKM syndrome stages
	Model 1		Model 2		Model 3
	HR (95% CI)	P	HR (95% CI)	P	HR (95% CI)	P
Early CKM with normal muscle strength	Ref		Ref		Ref
Early CKM with low muscle strength	4.205 (2.881-6.136)	<0.001	1.689 (1.128-2.528)	0.011	1.635 (1.081-2.473)	0.02
Advanced CKM with normal muscle strength	4.09 (2.164-7.731)	<0.001	2.266 (1.190-4.315)	0.013	2.334 (1.226-4.443)	0.01
Advanced CKM with low muscle strength	16.269 (10.910-24.260)	<0.001	3.629 (2.293-5.744)	<0.001	3.359 (2.103-5.365)	<0.001
P for trend		<0.001		<0.001		<0.001
Model 1: Unadjusted model; Model 2: adjusted for age and gender; Model 3: Model 2 further adjusted for education, residence, marital, smoking, drinking, and serum creatinine. Abbreviations: CKM, cardiovascular-kidney-metabolic; HR, hazard ratio; CI, confidence interval; Ref, reference.

## Sheet: Table S4
Table S4 Association between SMI and the risk of all-cause mortality stratified by early and advanced CKM syndrome stages
	Model 1		Model 2		Model 3
	HR (95% CI)	P	HR (95% CI)	P	HR (95% CI)	P
Early CKM with normal muscle mass	Ref		Ref		Ref
Early CKM with low muscle mass	5.43 (3.078-9.580)	<0.0001	2.649 (1.482-4.737)	0.001	2.675 (1.492-4.797)	0.001
Advanced CKM with normal muscle mass	6.001 (3.793-9.494)	<0.0001	2.303 (1.419-3.738)	<0.001	2.237 (1.366-3.662)	0.001
Advanced CKM with low muscle mass	17.712 (11.089-28.288)	<0.0001	3.48 (2.052-5.904)	<0.001	3.492 (2.025-6.021)	<0.001
P for trend		<0.0001		<0.001		<0.001
Model 1: Unadjusted model; Model 2: adjusted for age and gender; Model 3: Model 2 further adjusted for education, residence, marital, smoking, drinking, and serum creatinine. Abbreviations: CKM, cardiovascular-kidney-metabolic; HR, hazard ratio; CI, confidence interval; Ref, reference.

## Sheet: Table S5
Table S5 Association between sarcopenia and the risk of all‐cause mortality after excluding participants with cancer, liver disease, kidney disease and lung disease across different CKM syndrome stages
	Model 1		Model 2		Model 3
	HR (95% CI)	P	HR (95% CI)	P	HR (95% CI)	P
Early CKM without sarcopenia	Ref		Ref		Ref
Early CKM with sarcopenia	8.183 (3.475-19.267)	<0.001	2.81 (1.165-6.778)	0.022	2.833 (1.170-6.861)	0.021
Advanced CKM without sarcopenia	10.354 (5.523-19.411)	<0.001	3.76 (1.942-7.280)	<0.001	3.533 (1.806-6.910)	<0.001
Advanced CKM with sarcopenia	24.809 (12.730-48.351)	<0.001	3.922 (1.859-8.275)	<0.001	3.855 (1.794-8.284)	<0.001
P for trend		<0.001		0.034		0.032
Model 1: Unadjusted model; Model 2: adjusted for age and gender; Model 3: Model 2 further adjusted for education, residence, marital, smoking, drinking, and serum creatinine. Abbreviations: CKM, cardiovascular-kidney-metabolic; HR, hazard ratio; CI, confidence interval; Ref, reference.

## Sheet: Table S6
Table S6 Association between sarcopenia and the risk of premature deaths across different CKM syndrome stages
	Model 1		Model 2		Model 3
	HR (95% CI)	P	HR (95% CI)	P	HR (95% CI)	P
Early CKM without sarcopenia	Ref		Ref		Ref
Early CKM with sarcopenia	3.693 (1.758-7.758)	<0.001	3.366 (1.540-7.359)	0.002	3.400 (1.550-7.459)	0.002
Advanced CKM without sarcopenia	4.021 (2.515-6.430)	<0.001	3.312 (1.992-5.506)	<0.001	3.171 (1.883-5.341)	<0.001
Advanced CKM with sarcopenia	4.725 (2.524-8.845)	<0.001	3.563 (1.714-7.405)	<0.001	3.602 (1.698-7.640)	<0.001
P for trend		<0.001		0.001		0.002
Model 1: Unadjusted model; Model 2: adjusted for age and gender; Model 3: Model 2 further adjusted for education, residence, marital, smoking, drinking, and serum creatinine. Abbreviations: CKM, cardiovascular-kidney-metabolic; HR, hazard ratio; CI, confidence interval; Ref, reference.

## Sheet: Table S7
Table S7 Association between newly classified sarcopenia status and the risk of all‐cause mortality across different CKM syndrome stages
	Model 1		Model 2		Model 3
	HR (95% CI)	P	HR (95% CI)	P	HR (95% CI)	P
Early CKM without sarcopenia	Ref		Ref		Ref
Early CKM with possible sarcopenia	1.866 (0.564- 6.179)	0.307	1.188 (0.358-3.945)	0.778	1.169 (0.352-3.885)	0.799
Early CKM with sarcopenia	6.302 (3.501-11.345)	<0.001	2.339 (1.267-4.318)	0.007	2.374 (1.282-4.397)	0.006
Advanced CKM without sarcopenia	4.522 (2.894- 7.067)	<0.001	1.854 (1.157-2.971)	0.01	1.797 (1.112-2.905)	0.017
Advanced CKM with possible sarcopenia	15.246 (9.126-25.471)	<0.001	3.965 (2.253-6.980)	<0.001	3.789 (2.132-6.732)	<0.001
Advanced CKM with sarcopenia	17.021 (10.816-26.785)	<0.001	3.128 (1.843-5.306)	<0.001	3.137 (1.816-5.419)	<0.001
P for trend		<0.001		<0.001		<0.001
Model 1: Unadjusted model; Model 2: adjusted for age and gender; Model 3: Model 2 further adjusted for education, residence, marital, smoking, drinking, and serum creatinine. Abbreviations: CKM, cardiovascular-kidney-metabolic; HR, hazard ratio; CI, confidence interval; Ref, reference.

## Sheet: Table S8
Table S8 Baseline characteristics of participants stratified by changes in sarcopenic status
Variables	Total (n=5760)	Stable no sarcopenia (n=4673)	Stable sarcopenia (n=628)	No sarcopenia to sarcopenia (n=274)	Sarcopenia to no sarcopenia (n=185)	P
Gender						0.03
Female (%)	3105 (53.91)	2513 (53.78)	358 (57.01)	151 (55.11)	83 (44.86)
Male (%)	2655 (46.09)	2160 (46.22)	270 (42.99)	123 (44.89)	102 (55.14)
Age (years)	58.87 ± 8.59	57.15 ± 7.86	68.50 ± 6.88	62.73 ± 7.65	63.86 ± 7.43	<0.01
Married (%)	5164(89.65)	4282 (91.63)	491 (78.18)	235 (85.77)	156 (84.32)	<0.01
Education						<0.01
Less than lower secondary education	5184 (90.00)	4131 (88.40)	613 (97.61)	263 (95.99)	177 (95.68)
Tertiary education	77 (1.34)	69 (1.48)	2 (0.32)	6 (2.19)	0 (0)
Upper secondary and vocational training	499 (8.66)	473 (10.12)	13 (2.07)	5 (1.82)	8 (4.32)
Rural residence (%)	3891 (67.55)	3052 (65.31)	500 (79.62)	188 (68.61)	151 (81.62)	<0.01
Smoking (%)	1774 (30.80)	1374 (29.40)	219 (34.87)	105 (38.32)	76 (41.08)	<0.01
Drinking (%)	1899 (32.97)	1570 (33.60)	184 (29.30)	82 (29.93)	63 (34.05)	0.12
SBP (mmHg)	130.35 ± 20.86	130.34 ± 20.50	131.16 ± 23.01	129.25 ± 21.10	129.50 ± 21.79	0.57
DBP (mmHg)	75.83 ± 12.15	76.66 ± 12.11	71.88 ± 11.64	72.81 ± 11.60	72.92 ± 12.05	<0.01
BMI (kg/m2)	23.61 ± 3.81	24.55 ± 3.51	19.08 ± 1.67	21.02 ± 2.58	19.33 ± 1.54	<0.01
CRP (mg/L)	2.29 ± 6.43	2.32 ± 6.22	2.15 ± 5.73	2.73 ± 11.44	1.33 ± 1.72	0.12
FPG (mg/dL)	109.39 ± 33.49	110.12 ± 35.02	104.59 ± 23.86	108.94 ± 29.60	107.92 ± 25.03	<0.01
HbA1c (%)	5.26 ± 0.76	5.27 ± 0.78	5.14 ± 0.52	5.26 ± 0.82	5.20 ± 0.69	<0.01
TC (mg/dL)	195.12 ± 38.56	195.82 ± 38.91	191.14 ± 36.39	192.24 ± 35.75	195.33 ± 40.08	0.02
HDL-C (mg/dL)	51.26 ± 15.27	49.76 ± 14.56	58.45 ± 16.62	55.22 ± 15.45	59.13 ± 17.36	<0.01
LDL-C (mg/dL)	117.74 ± 35.04	118.70 ± 35.40	112.44 ± 32.38	114.60 ± 33.47	116.09 ± 35.17	<0.01
TG (mg/dL)	133.52 ± 110.16	139.11 ± 113.76	105.54 ± 63.35	115.54 ± 89.74	113.89 ± 145.99	<0.01
Creatinine (mg/dL)	0.78 ± 0.18	0.78 ± 0.18	0.76 ± 0.18	0.77 ± 0.17	0.81 ± 0.21	0.02
BUN (mg/dL)	15.71 ± 4.42	15.58 ± 4.36	16.14 ± 4.49	16.40 ± 4.69	16.26 ± 5.03	<0.01
Hypertension (%)	2317 (40.23)	1921 (41.11)	230 (36.62)	99 (36.13)	67 (36.22)	0.05
Diabetes (%)	789 (13.70)	687 (14.70)	52 (8.28)	33 (12.04)	17 (9.19)	<0.01
Hyperlipidemia (%)	1327 (24.60)	1153 (26.22)	98 (16.93)	48 (19.35)	28 (16.57)	<0.01
Cancer (%)	43 (0.75)	35 (0.75)	4 (0.64)	4 (1.47)	0 (0)	0.34
Lung disease (%)	556 (9.68)	406 (8.71)	95 (15.20)	27 (9.89)	28 (15.30)	<0.01
Liver disease (%)	178 (3.11)	155 (3.34)	11 (1.76)	8 (2.94)	4 (2.19)	0.16
Kidney disease (%)	296 (5.17)	247 (5.31)	27 (4.34)	13 (4.74)	9 (4.89)	0.75
CKM syndrome stages (%)						<0.01
Stage 0	380 (6.60)	261 (5.59)	66 (10.51)	26 (9.49)	27 (14.59)
Stage 1	887(15.40)	748 (16.01)	76 (12.10)	34 (12.41)	29 (15.68)
Stage 2	1873 (32.52)	1652 (35.35)	113 (17.99)	67 (24.45)	41 (22.16)
Stage 3	1834 (31.84)	1369 (29.30)	290 (46.18)	110 (40.15)	65 (35.14)
Stage 4	786 (13.65)	643 (13.76)	83 (13.22)	37 (13.50)	23 (12.43)
Advanced CKM stages (%)	2620 (45.49)	2012 (43.06)	373 (59.39)	147 (53.65)	88 (47.57)	<0.01
Data were expressed as mean ± SD or numbers (percentages). Abbreviations: SBP, systolic blood pressure; DBP, diastolic blood pressure; CRP, C-reactive protein; BMI, body mass index; FPG, fasting plasma glucose; HbA1c, glycated hemoglobin; BUN, blood urea nitrogen; TC, total cholesterol; HDL-C, high-density lipoprotein cholesterol; LDL-C, low-density lipoprotein cholesterol; TG, triglyceride; CKM,…
